# Supplementary material for: Mid-Pregnancy Fructosamine Measurement—Predictive Value for Gestational Diabetes and Association with Postpartum Glycemic Indices
Source: MDPI journal article supplement (doi:10.3390/nu10122003), 2018-12-18
Supplement: s1 [file s1]

## Supplementary Tables

**Table S1.** Unadjusted and adjusted associations of glucose exposures with fructosamine levels in mid-pregnancy, without vs. with IPW.

| Exposure                                     | Without IPW      |                       | With IPW         |                       |
|----------------------------------------------|------------------|-----------------------|------------------|-----------------------|
|                                              | Unadjusted       | Adjusted <sup>1</sup> | Unadjusted       | Adjusted <sup>1</sup> |
|                                              | $\beta$ (95% CI) |                       | $\beta$ (95% CI) |                       |
| 1h-glucose after GCT (per SD)                | 2.7 (0.3, 5.0)   | 3.4 (1.0, 5.8)        | 2.9 (0.5, 5.2)   | 3.6 (1.2, 6.0)        |
| Abnormal GCT result (> vs. $\leq$ 140 mg/dl) | 5.5 (-0.8, 11.7) | 7.1 (0.7, 13.5)       | 5.8 (-0.4, 12.1) | 7.5 (1.1, 13.9)       |
| GDM (vs. IGT/IH/normal glycemia)             | 11.6 (0.9, 22.4) | 14.7 (3.7, 25.6)      | 12.4 (1.8, 23.1) | 15.5 (4.7, 26.3)      |

IPW = inverse probability weighting; <sup>1</sup>Adjusted for maternal age, race/ethnicity, parity, smoking during pregnancy, first trimester weight gain and maternal pre-pregnancy BMI.

**Table S2.** ROC curve (AUC) values for the predictive value of fructosamine levels, without vs. with IPW.

| Outcome                         |           | Without IPW     | With IPW        |
|---------------------------------|-----------|-----------------|-----------------|
|                                 |           | ROC curve (AUC) | ROC curve (AUC) |
| GDM                             |           | 0.52            | 0.52            |
| <i>Stratified by GDM status</i> |           |                 |                 |
| Macrosomia                      | GDM = Yes | 0.48            | 0.48            |
| Macrosomia                      | GDM = No  | 0.52            | 0.52            |
| LGA                             | GDM = Yes | 0.59            | 0.59            |
| LGA                             | GDM = No  | 0.53            | 0.53            |
| SGA                             | GDM = Yes | 0.57            | 0.57            |
| SGA                             | GDM = No  | 0.51            | 0.51            |
| Preterm (< 37 weeks)            | GDM = Yes | 0.46            | 0.46            |
| Preterm (< 37 weeks)            | GDM = No  | 0.50            | 0.50            |
| Cesarean section                | GDM = Yes | 0.58            | 0.42            |
| Cesarean section                | GDM = No  | 0.54            | 0.54            |

IPW = inverse probability weighting; ROC = receiver operating characteristic; AUC = area under the ROC curve.

**Table S3.** Multivariable associations of fructosamine and GCT levels in mid-pregnancy with birth weight and birth weight for gestational age z score, without vs. with IPW.

| Exposure,<br>per 1 SD | Outcome           | Stratified by<br>GDM status | Without IPW                   | With IPW                      |
|-----------------------|-------------------|-----------------------------|-------------------------------|-------------------------------|
|                       |                   |                             | $\beta$ (95% CI) <sup>1</sup> | $\beta$ (95% CI) <sup>1</sup> |
| Fructosamine          | Birthweight, g    | GDM = No                    | 5.7 (-22.5, 33.9)             | 6.8 (-21.4, 34.9)             |
| Fructosamine          | Birthweight, g    | GDM = Yes                   | 69.6 (-16.9, 156.1)           | 64.5 (-20.4, 149.5)           |
| Fructosamine          | BW for GA z-score | GDM = No                    | 0.00 (-0.05, 0.05)            | 0.01 (-0.04, 0.06)            |
| Fructosamine          | BW for GA z-score | GDM = Yes                   | 0.11 (-0.05, 0.27)            | 0.10 (-0.06, 0.25)            |
| GCT                   | BW for GA z-score | GDM = No                    | 54.2 (24.2, 84.1)             | 53.5 (23.5, 83.4)             |
| GCT                   | BW for GA z-score | GDM = Yes                   | 30.0 (-143, 203.0)            | 20.9 (-151, 192.3)            |
| GCT                   | BW for GA z-score | GDM = No                    | 0.11 (0.05, 0.16)             | 0.11 (0.05, 0.16)             |
| GCT                   | BW for GA z-score | GDM = Yes                   | -0.09 (-0.40, 0.22)           | -0.08 (-0.40, 0.23)           |

IPW = inverse probability weighting; GCT = glucose challenge test; <sup>1</sup> Adjusted for maternal age, race/ethnicity, parity, smoking during pregnancy, first trimester weight gain and maternal pre-pregnancy BMI.

**Table S4.** Multivariable associations of fructosamine and GCT levels in mid-pregnancy with maternal 3-year postpartum glycemic indices, without vs. with IPW ( $N = 451$  <sup>1</sup>).

|                        | Without IPW                        | With IPW          | Without IPW                        | With IPW          |
|------------------------|------------------------------------|-------------------|------------------------------------|-------------------|
|                        | Fructosamine, per 1 SD increment   |                   | GCT Result, per 1 SD increment     |                   |
|                        | $\beta$ (95% CI) <sup>2</sup>      |                   | $\beta$ (95% CI) <sup>2</sup>      |                   |
| A1c, %                 | 0.03 [0.00, 0.05]                  | 0.02 (0.00, 0.05) | 0.04 [0.02, 0.07]                  | 0.05 (0.02, 0.07) |
| Fasting glucose, mg/dl | 2.7 [-0.1, 5.5]                    | 3.3 (0.4, 6.1)    | 3.6 [0.8, 6.4]                     | 4.1 (1.2, 7.0)    |
|                        | % difference (95% CI) <sup>2</sup> |                   | % difference (95% CI) <sup>2</sup> |                   |
| Log fasting insulin    | 12.3 [2.1, 23.5]                   | 13.4 (3.2, 24.7)  | 11.4 [1.1, 22.7]                   | 12.5 (2.2, 23.9)  |
| Log HOMA-IR            | 15.7 [3.7, 29.0]                   | 17.7 (5.6, 31.3)  | 17.6 [5.4, 31.2]                   | 19.7 (7.2, 33.5)  |

IPW = inverse probability weighting; GCT = glucose challenge test; <sup>1</sup>  $N = 132$  for fasting glucose, fasting insulin and HOMA-IR and  $N = 450$  for A1c; <sup>2</sup> Adjusted for maternal age, race/ethnicity, parity, smoking during pregnancy, first trimester weight gain and maternal pre-pregnancy BMI.
